# Supplementary material
Source: publisher figshare collection journal article supplement (https://frontiersin.figshare.com/ndownloader/files/35080660)
Supplement: Supplementary file 1 [file 35080660]

ID	sex_	sex_	0338_	0338_	0377_	0377_	21049_	21049_	215863_	215863_	225352_	225352_	233394_	233394_	233459_	233459_	237847_	237847_	23894_	23894_	245227_	245227_	248567_	248567_	2497_	2497_	250773_	250773_	254323_	254323_	255473_	255473_	258231_	258231_	3125_	3125_	313_	313_	3142_	3142_	3161_	3161_	3182_	3182_	327_	327_	3282_	3282_	3292_
Tier0320	f	f	106	109	188	188	203	203	173	173	213	215	166	166	214	222	246	252	220	224	216	216	261	279	154	158	256	260	199	201	268	270	285	285	257	257	173	176	234	237	276	294	261	261	284	292	238	238	218
Tier0592	f	f	106	109	170	188	203	207	173	177	213	213	166	174	222	222	250	252	220	220	216	216	261	279	154	154	260	260	199	207	268	270	285	285	248	248	173	173	237	237	276	276	261	261	292	292	238	238	218
Tier0896	m	m	106	109	170	188	203	207	173	177	207	213	166	166	214	222	250	250	220	220	216	216	279	279	154	158	256	260	201	207	268	270	285	285	257	257	173	173	237	240	276	276	261	261	284	292	238	238	230
Tier2560	f	f	106	109	170	188	203	203	173	177	213	215	166	166	222	222	250	250	220	224	216	216	261	279	154	154	256	260	199	201	268	270	285	285	257	257	173	176	234	237	276	276	261	261	284	292	238	238	230
Tier2704	f	f	106	109	188	188	203	203	173	177	207	213	166	174	222	222	250	252	220	224	216	216	261	261	154	154	256	260	201	207	268	270	285	285	257	257	173	173	237	237	276	294	261	261	292	292	238	238	218
Tier2800	f	f	106	106	170	188	203	207	173	177	207	215	166	166	222	222	246	252	220	220	216	216	279	279	154	154	256	260	199	201	268	270	285	285	248	257	173	176	237	240	276	294	261	261	284	292	238	238	230
Tier2832	f	f	106	106	188	188	203	207	173	177	207	215	166	166	222	222	246	246	220	224	216	216	279	279	154	154	256	260	201	207	268	270	285	285	248	257	173	176	234	240	276	276	261	261	292	292	238	238	218
Tier4160a	f	f	106	109	170	188	203	203	173	177	207	213	166	174	214	222	246	250	220	224	216	216	261	279	154	158	256	260	199	201	268	270	285	285	248	257	173	173	234	240	276	294	261	261	292	292	238	238	230
Tier4160b	f	f	106	109	170	188	203	203	173	173	207	215	166	174	214	222	246	252	220	224	216	216	279	279	154	158	256	260	201	207	268	270	285	285	257	257	173	176	234	237	276	294	261	261	284	292	238	238	230
Tier4864	f	f	106	109	170	188	203	203	173	177	207	213	166	174	222	222	246	250	220	224	216	216	261	279	154	154	256	260	201	207	270	270	285	285	248	257	173	173	234	237	276	294	261	261	284	292	238	238	218
Tier4868	f	f	106	109	170	188	203	207	173	177	207	215	166	166	214	222	250	252	220	220	216	216	279	279	154	158	260	260	199	207	268	270	285	285	248	257	173	173	237	237	276	276	261	261	292	292	238	238	230
Tier5344	f	f	106	109	188	188	203	207	173	177	207	215	174	174	222	222	246	246	220	224	216	216	261	279	154	154	256	260	201	207	268	270	285	285	257	257	173	176	234	240	276	276	261	261	284	292	238	238	218
Tier6064	f	f	106	106	188	188	203	207	173	173	213	215	166	166	214	222	246	250	220	220	216	216	279	279	154	158	260	260	199	207	268	270	285	285	248	257	173	176	234	240	276	294	261	261	292	292	238	238	230
Tier7296	f	f	106	109	170	188	203	207	173	177	207	215	166	174	214	222	250	252	224	224	216	216	279	279	154	158	260	260	207	207	268	270	285	285	248	257	173	176	234	240	276	294	261	261	292	292	238	238	218
Tier7568	m	m	106	106	170	188	203	203	173	173	207	215	166	174	222	222	246	250	220	220	216	216	261	279	154	154	256	260	199	201	268	270	285	285	257	257	173	176	234	237	276	276	261	261	292	292	238	238	218
Tier7616	m	m	106	109	188	188	203	207	173	173	213	215	166	166	214	222	250	252	220	220	216	216	261	279	154	158	256	260	199	201	268	270	285	285	248	257	173	176	237	240	276	276	261	261	292	292	238	238	230
Tier7872	m	m	106	109	170	188	203	203	173	173	213	213	166	166	222	222	250	252	220	220	216	216	261	279	154	154	256	260	201	207	270	270	285	285	248	257	173	176	237	237	276	294	261	261	292	292	238	238	218
Tier8000	m	m	106	109	188	188	203	207	173	173	207	213	166	166	222	222	250	252	220	220	216	216	261	261	154	154	256	256	201	201	268	270	285	285	248	257	173	173	234	240	276	294	261	261	284	292	238	238	230
Tier9104	f	f	106	109	188	188	203	203	173	173	207	215	166	174	214	222	250	252	220	224	216	216	261	279	154	158	256	256	201	201	270	270	285	285	257	257	173	176	234	240	276	294	261	261	292	292	238	238	218
Tier9460	f	f	106	109	188	188	203	203	173	177	213	213	166	166	214	222	250	250	220	220	216	216	261	279	154	158	256	260	199	201	268	270	285	285	257	257	173	173	234	240	276	294	261	261	284	292	238	238	230
Tier9568	f	f	106	106	170	188	203	203	173	173	207	213	166	174	214	222	246	250	220	224	216	216	279	279	154	158	256	256	201	201	268	270	285	285	248	257	173	176	237	240	276	276	261	261	284	292	238	238	230
[truncated: 31 more columns]
